# Supplementary material
Source: PubMed Central journal article supplement (PMC9500427)
Supplement: sj-pdf-1-prx-10.1177_00332941221127632.pdf [file sj-pdf-1-prx-10.1177_00332941221127632.pdf]

**Supplemental Table S1. Correlation table of GAD-7, BDI-II, and PSS-10 scores: Spearman's rho correlation**

|                     |                                | <b>GAD-7 score</b> | <b>BDI-II score</b> | <b>PSS-10 score</b> |
|---------------------|--------------------------------|--------------------|---------------------|---------------------|
| <b>GAD-7 score</b>  | <i>Correlation Coefficient</i> | 1.000              | 0.718               | 0.756               |
|                     | <i>P-value (2-tailed)</i>      | .                  | <b>&lt;0.001</b>    | <b>&lt;0.001</b>    |
|                     | <i>N</i>                       | 1329               | 1326                | 1329                |
| <b>BDI-II score</b> | <i>Correlation Coefficient</i> | 0.718              | 1.000               | 0.798               |
|                     | <i>P-value (2-tailed)</i>      | <b>&lt;0.001</b>   | .                   | <b>&lt;0.001</b>    |
|                     | <i>N</i>                       | 1326               | 1326                | 1326                |
| <b>PSS-10 score</b> | <i>Correlation Coefficient</i> | 0.756              | 0.798               | 1.000               |
|                     | <i>P-value (2-tailed)</i>      | <b>&lt;0.001</b>   | <b>&lt;0.001</b>    | .                   |
|                     | <i>N</i>                       | 1329               | 1326                | 1329                |

Notes: BDI-II: Beck Depression Scale II; GAD-7: Generalized Anxiety Scale; PSS-10: Perceived Stress Scale 10
